# Supplementary material
Source: ML conference proceedings conference paper supplement (https://openaccess.thecvf.com/content/ICCV2023/html/Zhao_Spherical_Space_Feature_Decomposition_for_Guided_Depth_Map_Super-Resolution_ICCV_2023_paper.html)
Supplement: Supplementary file 1 [file Zhao_Spherical_Space_Feature_Decomposition_for_Guided_Depth_Map_Super-Resolution_ICCV_2023_supplemental.pdf]

# Spherical Space Feature Decomposition for Guided Depth Map Super-Resolution

## SUPPLEMENTARY MATERIALS

Zixiang Zhao<sup>1,2</sup> Jiangshe Zhang<sup>1\*</sup> Xiang Gu<sup>1</sup> Chengli Tan<sup>1</sup>  
Shuang Xu<sup>3</sup> Yulun Zhang<sup>2</sup> Radu Timofte<sup>2,4</sup> Luc Van Gool<sup>2</sup>

<sup>1</sup>Xi'an Jiaotong University <sup>2</sup>Computer Vision Lab, ETH Zürich  
<sup>3</sup>Northwestern Polytechnical University <sup>4</sup>University of Würzburg

zixiangzhao@stu.xjtu.edu.cn, jszhang@mail.xjtu.edu.cn

### Abstract

*In this document, we provide the additional supplementary information for the paper “Spherical Space Feature Decomposition for Guided Depth Map Super-Resolution”. This file contains:*

- (I) *The detail architecture for Restormer Block and the Depth Encoder ( $\mathcal{E}_D$ ) in Sec. 3.1.2.*
- (II) *Training details for the Defect Patches Classifier of Spherical Contrast Refinement (SCR) module in Sec. 3.1.4.*
- (III) *Detailed illustration for the training&testing datasets in Sec. 4.1.*
- (IV) *Detailed introduction for the selection and analysis of hyperparameters in Sec. 4.1.*
- (V) *More qualitative comparison fusion results in Sec. 4.2.*

### 1. Detailed introduction for $\mathcal{E}_D$ and $\mathcal{E}_R$

The detailed architecture for *Depth Encoder*  $\mathcal{E}_D$  (similar to the RGB Encoder  $\mathcal{E}_R$ ) and the Restormer block [10] in  $\mathcal{E}_D$  are illustrated in Fig. 1.

### 2. Training details for the Defect Patches Classifier of spherical contrast refinement (SCR)

We train the *Defect Patches Classifier* (DPC) on our synthetic “imperfect image dataset” and we utilize the following settings. We use inputs of size  $64 \times 64$  with a batch size of 256. We train the model for 300 epochs with an initial learning rate of 0.001 (decrease by  $10 \times$  every 100 epochs), momentum of 0.9 and weight decay of  $10^{-6}$ . The standard multi-class cross-entropy loss is used to train the network. We achieve a training accuracy of 97% and a validation accuracy of 92% in the validation set.

### 3. Detailed introduction to datasets

We adopt four widely-used benchmarks (NYU v2 [8], Middlebury [2, 7], Lu [6] and RGBDD dataset [1]) for the guided depth super-resolution task. The preprocessing and separation of NYU v2, Middlebury, and Lu datasets follow [4, 5, 9, 3, 12], and that of RGBDD dataset follows [1, 12].

- NYU v2 dataset<sup>1</sup> [8]: it consists of 1449 RGBD image pairs captured by the Microsoft Kinect [11]. We use the first 1,000 images in this dataset for training, and the rest 449 images for testing.
- Middlebury dataset<sup>2</sup> [2, 7]: we use 30 image pairs from 2001-2006 datasets provided by Lu *et al.* [6] for testing.

---

\*Corresponding author.

<sup>1</sup>[https://cs.nyu.edu/silberman/datasets/nyu\\_depth\\_v2.html](https://cs.nyu.edu/silberman/datasets/nyu_depth_v2.html)

<sup>2</sup><https://vision.middlebury.edu/stereo/data/>

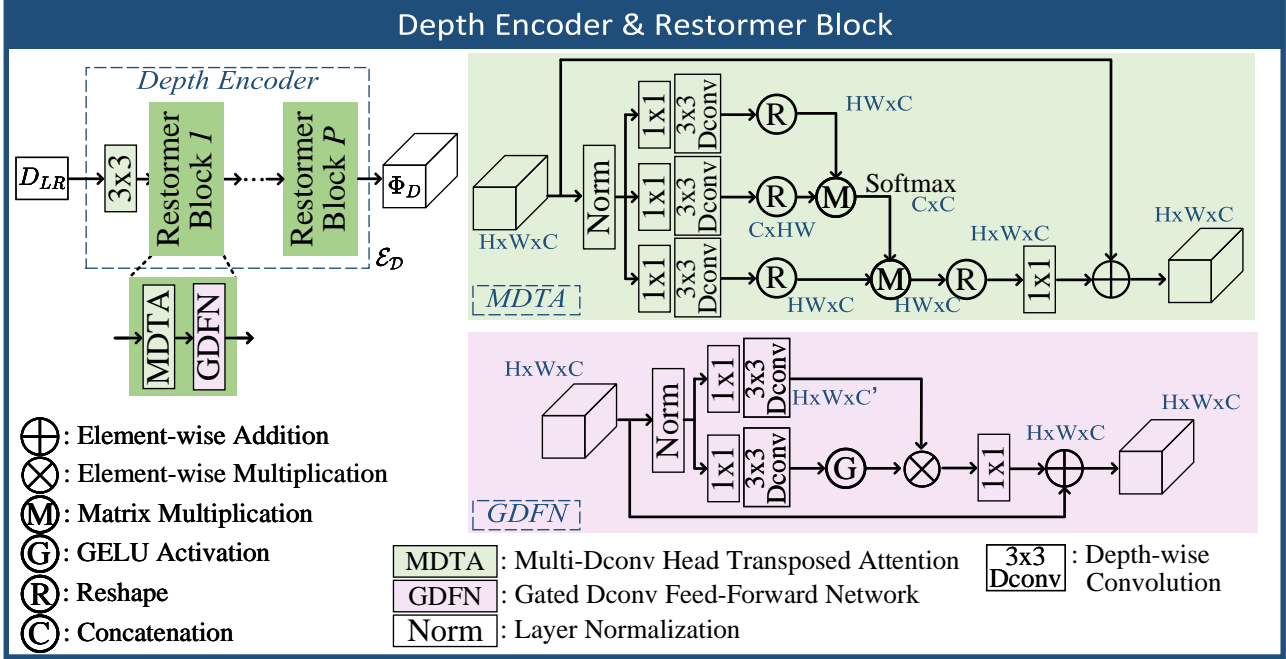

Figure 1: Detail architecture for *Depth Encoder* and the Restormer block of SSDNet.

| Interval training epoch for SCR fine-tuning |      |      |      |      |      |      |
|---------------------------------------------|------|------|------|------|------|------|
| Scaling factor                              | 1    | 2    | 5    | 10   | 20   | 50   |
| ×4                                          | 1.57 | 1.58 | 1.60 | 1.61 | 1.72 | 1.83 |
| ×8                                          | 3.08 | 3.08 | 3.10 | 3.11 | 3.22 | 3.38 |
| ×16                                         | 5.81 | 5.81 | 5.82 | 5.84 | 6.23 | 6.72 |

Table 1: The impacts of interval training epoch  $M$  for performing SCR fine-tuning on the SSDNet.

- Lu dataset<sup>3</sup> [6]: this dataset consists of 6 RGBD image pairs acquired by ASUS Xtion Pro camera. We use it for testing.
- RGBDD dataset<sup>4</sup> [1]: a new RGBD dataset benchmark proposed in CVPR 2021 [1] with four main categories: portraits, models, plants, and lights. The RGB images and LR depth maps are collected by Huawei P30 Pro and the HR depth maps are captured by Helios ToF camera<sup>5</sup> produced by LUCID vision labs. In our experiments, 297 portraits, 68 plants, and 40 models are utilized for testing. For the *real-world branch*, 1586 portraits, 380 plants, and 249 models are for training, and the test set is the same as above.

#### 4. Selection for the hyperparameters

In this section, we determine the interval training epoch  $M$  for performing *Spherical Contrast Refinement* (SCR) fine-tuning. For our proposed SSDNet, SCR fine-tuning is important in addressing the detail issue and further improving the effectiveness of GDSR. We show the results for performing SCR fine-tuning once at every different epoch in training, and the performance in the validation set is shown in Tab. 1.

Obviously, when  $M$  is below 10, there is no significant improvement in performance, but there is an increase in training time. Finally, to have a good balance of model performance and training cost, we set  $M = 10$  for the other experiments.

<sup>3</sup><http://web.cecs.pdx.edu/~fliu/project/depth-enhance/>

<sup>4</sup><http://mepro.bjtu.edu.cn/resource.html>

<sup>5</sup><https://thinklucid.com/helios-time-of-flight-tof-camera/>

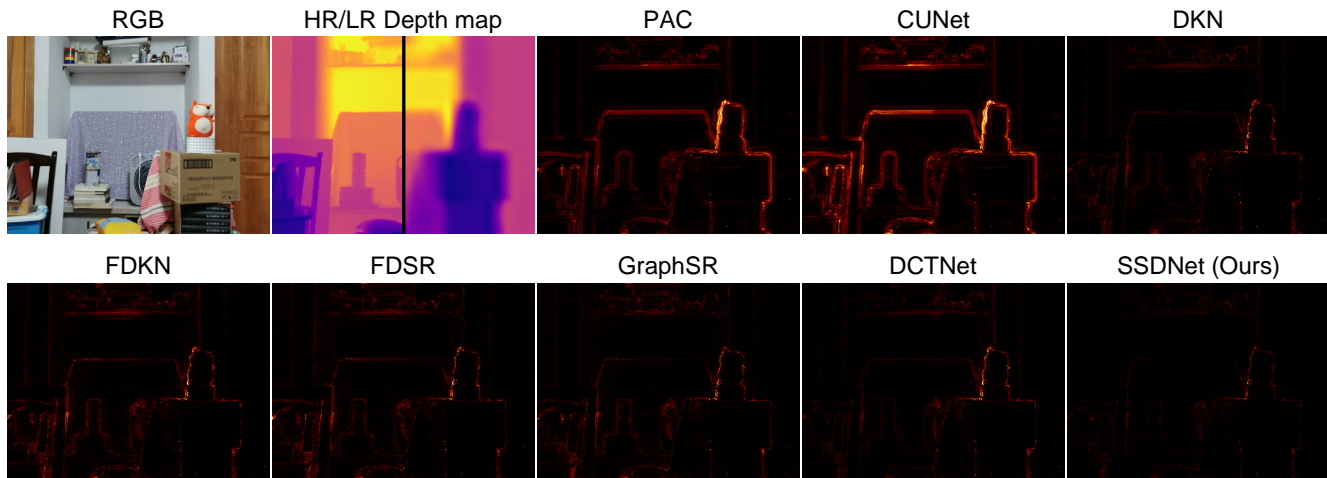

Figure 2: Error maps for visual comparisons in  $8\times$  upscaling.

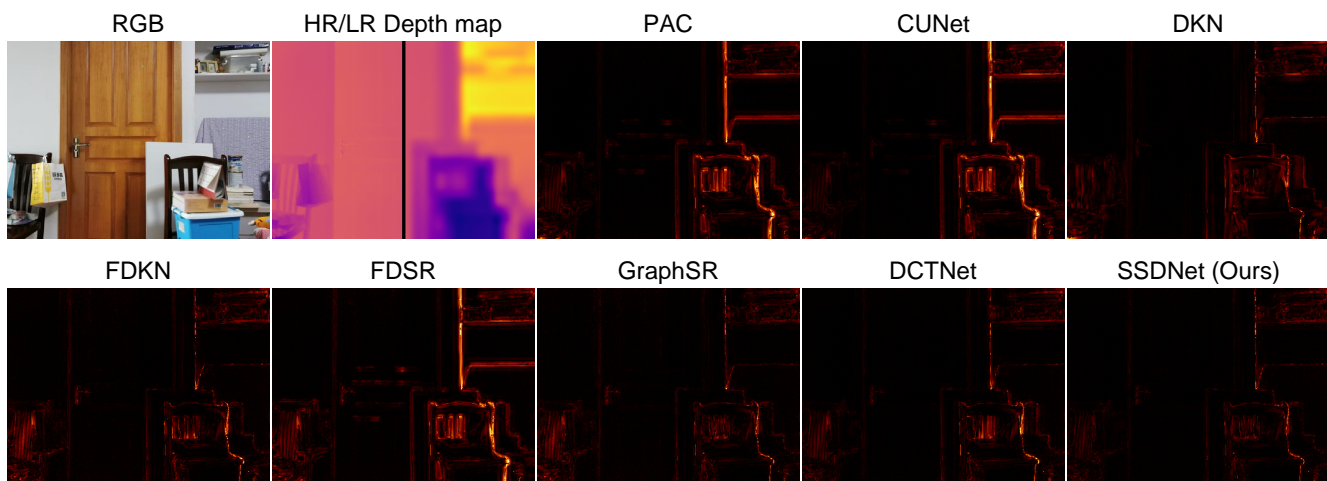

Figure 3: Error maps for visual comparisons in  $8\times$  upscaling.

## 5. More qualitative comparison results

More qualitative comparison results are displayed in Figs. 2 to 5. Our method has excellent performance under multiple datasets and different downsampling scales, showing that our method is suitable for different objects and imaging conditions, and can outperform SOTA methods.

## References

- [1] Lingzhi He, Hongguang Zhu, Feng Li, Huihui Bai, Runmin Cong, Chunjie Zhang, Chunyu Lin, Meiqin Liu, and Yao Zhao. Towards fast and accurate real-world depth super-resolution: Benchmark dataset and baseline. In *CVPR*, pages 9229–9238, 2021. 1, 2
- [2] Heiko Hirschmüller and Daniel Scharstein. Evaluation of cost functions for stereo matching. In *CVPR*, 2007. 1
- [3] Beomjun Kim, Jean Ponce, and Bumsub Ham. Deformable kernel networks for joint image filtering. *Int. J. Comput. Vis.*, 129(2):579–600, 2021. 1
- [4] Yijun Li, Jia-Bin Huang, Narendra Ahuja, and Ming-Hsuan Yang. Deep joint image filtering. In *ECCV*, pages 154–169. Springer, 2016. 1
- [5] Yijun Li, Jia-Bin Huang, Narendra Ahuja, and Ming-Hsuan Yang. Joint image filtering with deep convolutional networks. *IEEE Trans. Pattern Anal. Mach. Intell.*, 41(8):1909–1923, 2019. 1

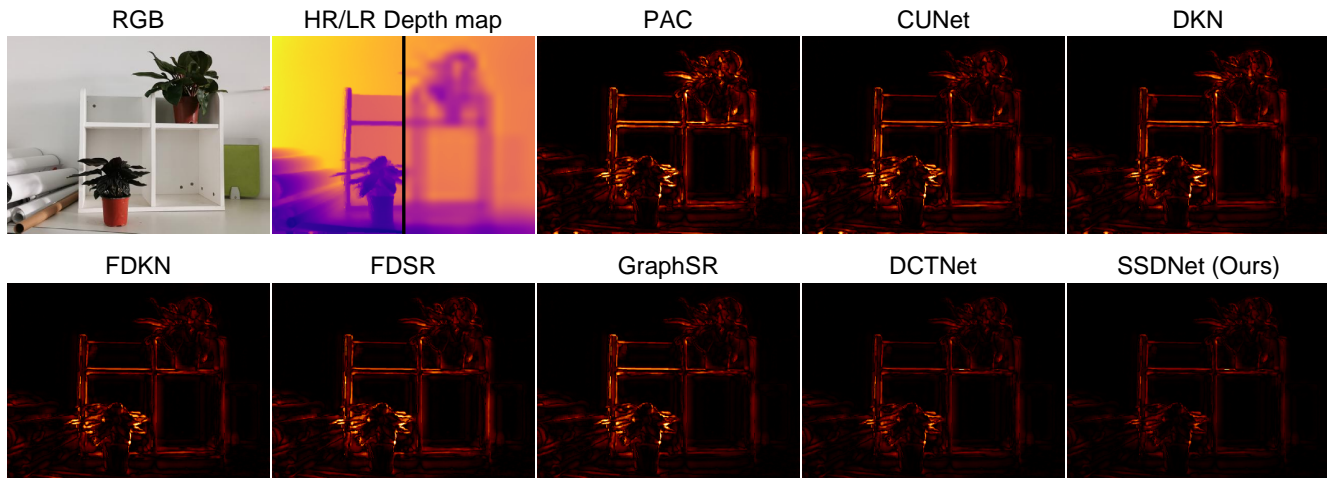

Figure 4: Error maps for visual comparisons in  $16\times$  upscaling.

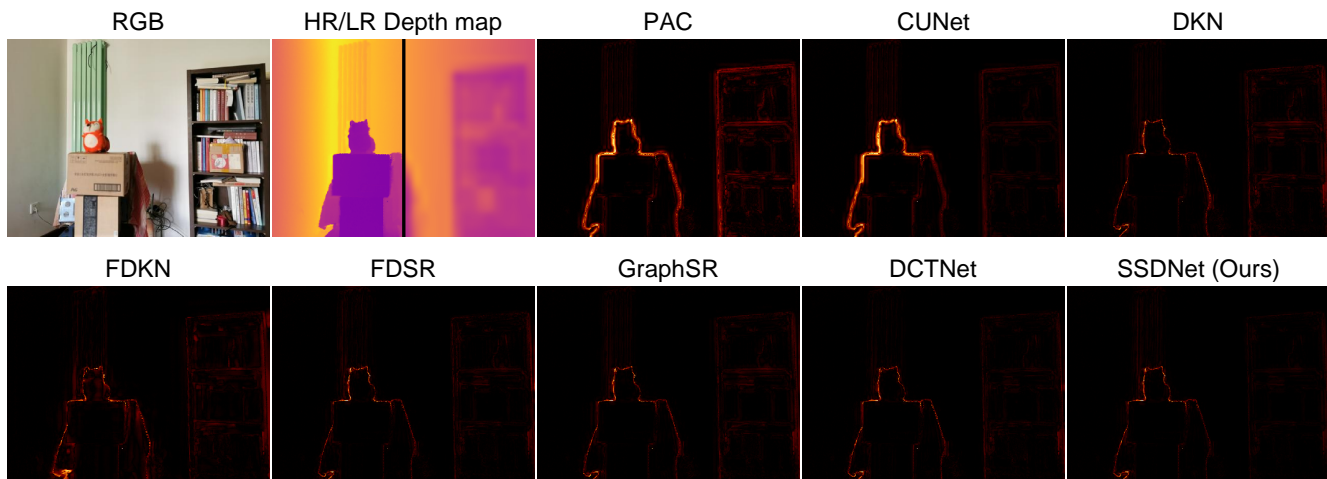

Figure 5: Error maps for visual comparisons in  $16\times$  upscaling.

- [6] Si Lu, Xiaofeng Ren, and Feng Liu. Depth enhancement via low-rank matrix completion. In *CVPR*, pages 3390–3397, 2014. 1, 2
- [7] Daniel Scharstein and Chris Pal. Learning conditional random fields for stereo. In *CVPR*, 2007. 1
- [8] Nathan Silberman, Derek Hoiem, Pushmeet Kohli, and Rob Fergus. Indoor segmentation and support inference from RGBD images. In *ECCV*, pages 746–760. Springer, 2012. 1
- [9] Hang Su, Varun Jampani, Deqing Sun, Orazio Gallo, Erik G. Learned-Miller, and Jan Kautz. Pixel-adaptive convolutional neural networks. In *CVPR*, pages 11166–11175, 2019. 1
- [10] Syed Waqas Zamir, Aditya Arora, Salman Khan, Munawar Hayat, Fahad Shahbaz Khan, and Ming-Hsuan Yang. Restormer: Efficient transformer for high-resolution image restoration. In *CVPR*, pages 5718–5729. IEEE, 2022. 1
- [11] Zhengyou Zhang. Microsoft kinect sensor and its effect. *IEEE Multim.*, 19(2):4–10, 2012. 1
- [12] Zixiang Zhao, Jianshe Zhang, Shuang Xu, Zudi Lin, and Hanspeter Pfister. Discrete cosine transform network for guided depth map super-resolution. In *CVPR*, pages 5687–5697. IEEE, 2022. 1
